# Supplementary material for: Retrogressive thaw slumps temper dissolved organic carbon delivery to streams of the Peel Plateau, NWT, Canada
Source: Copernicus journal article supplement (doi:10.5194/bg-14-5487-2017), 2017-12-06
Supplement: Supplementary file 2 [file Bulger_DOC manuscript_Tables S1 and S2.pdf › Bulger_DOC manuscript_Supplement/Bulger_DOC manuscript_Tables S1 and S2.pdf]

**Table S1:** Biogeochemical and optical data for upstream, within-slump, and downstream locations on the Peel Plateau. Blank cells indicate data not available or not collected.

| Site | Sample Location | Sample Date | Sp. Cond. $\mu\text{S cm}^{-1}$ | Na   | Ca    | Mg   | DOC  | TSS    | S <sub>R</sub> | S <sub>275-295</sub> | S <sub>350-400</sub> | SUVA | $\delta^{18}\text{O}$ |
|------|-----------------|-------------|---------------------------------|------|-------|------|------|--------|----------------|----------------------|----------------------|------|-----------------------|
| HA   | Downstream      | 9-Jul-14    | 1531                            | 33.2 | 220.8 | 75.5 | 10.5 | 26,040 | 0.85           | 20.2                 | 23.7                 | 1.3  | -22.0                 |
| HA   | Downstream      | 17-Aug-14   | 108.3                           | 4.3  | 14.8  | 4.7  | 8.9  | 7,600  | 0.83           | 13.9                 | 16.8                 | 3.5  |                       |
| HB   | Downstream      | 9-Jul-14    | 355.8                           | 7.6  | 42.8  | 16.0 | 6.3  | 16,338 | 0.87           | 15.9                 | 18.4                 | 2.6  | -20.4                 |
| HB   | Downstream      | 17-Aug-14   | 206.6                           | 6.6  | 27.1  | 9.3  | 5.9  | 9,700  | 0.98           | 14.0                 | 14.3                 | 3.2  |                       |
| HC   | Downstream      | 9-Jul-14    | 194.3                           | 4.5  | 23.9  | 8.9  | 7.6  | 20,884 | 1.02           | 13.9                 | 13.6                 | 3.0  | -20.4                 |
| HC   | Downstream      | 17-Aug-14   | 175.5                           | 5.1  | 24.6  | 8.6  | 6.1  | 33,188 | 1.07           | 13.2                 | 12.4                 | 3.2  |                       |
| HD   | Downstream      | 9-Jul-14    | 195.3                           | 4.4  | 22.5  | 7.4  | 12.6 | 3,818  | 0.78           | 14.7                 | 18.8                 | 3.2  | -20.7                 |
| HD   | Downstream      | 17-Aug-14   | 94.7                            | 3.3  | 16.6  | 4.3  | 14.1 | 947.1  | 0.78           | 13.3                 | 17.1                 | 4.0  |                       |
| SA   | Downstream      | 6-Jul-14    | 335.5                           | 23.3 | 35.9  | 1.3  | 19.0 |        |                |                      |                      |      |                       |
| SA   | Downstream      | 21-Jul-14   | 307.0                           | 16.3 | 41.6  | 11.5 | 22.0 | 3,564  | 0.79           | 14.5                 | 18.3                 | 3.6  | -20.6                 |
| SA   | Downstream      | 29-Jul-14   | 141.3                           | 8.3  | 23.8  | 7.4  | 21.2 | 4,047  | 0.76           | 13.5                 | 17.9                 | 3.9  |                       |
| SA   | Downstream      | 11-Aug-14   | 218.4                           | 10.0 | 26.6  | 8.0  | 21.7 | 5,364  | 0.78           | 13.6                 | 17.4                 | 3.7  |                       |
| SB   | Downstream      | 7-Jul-14    | 561.2                           | 29.7 | 93.0  | 33.6 | 9.5  |        | 0.96           | 16.0                 | 16.7                 | 2.5  |                       |
| SB   | Downstream      | 19-Jul-14   | 741.0                           | 36.6 | 96.4  | 32.4 | 11.1 | 7,400  | 0.81           | 16.7                 | 20.7                 | 2.3  | -20.7                 |
| SB   | Downstream      | 27-Jul-14   | 392.6                           | 12.0 | 46.4  | 17.8 | 11.8 | 8,456  | 0.82           | 13.9                 | 16.9                 | 3.4  |                       |
| SB   | Downstream      | 10-Aug-14   | 586.7                           | 22.3 | 67.1  | 30.2 | 10.9 | 35,500 | 0.82           | 15.3                 | 18.6                 | 2.9  |                       |
| SC   | Downstream      | 16-Jul-14   | 271.1                           | 9.6  | 32.8  | 11.7 | 12.6 | 14,000 | 0.91           | 13.5                 | 14.9                 | 3.4  | -20.7                 |
| SC   | Downstream      | 31-Jul-14   | 256.1                           | 9.7  | 28.9  | 10.4 | 9.4  | 27,050 | 0.92           | 14.2                 | 15.4                 | 3.2  |                       |
| SD   | Downstream      | 15-Jul-14   | 168.0                           | 2.1  | 18.2  | 6.9  | 6.0  | 11,033 | 1.01           | 15.7                 | 15.4                 | 2.4  | -19.9                 |
| SD   | Downstream      | 1-Aug-14    | 90.3                            | 2.9  | 12.0  | 4.4  | 7.8  | 2,117  | 0.78           | 14.4                 | 18.3                 | 3.5  |                       |
| SD   | Downstream      | 22-Aug-14   | 163.3                           | 3.8  | 18.9  | 7.1  | 6.0  | 1,160  | 0.82           | 14.0                 | 17.0                 | 3.1  |                       |
| HA   | Upstream        | 9-Jul-14    | 34.8                            | 0.5  | 7.2   | 1.8  | 11.8 | 149.1  | 0.7            | 13.5                 | 19.3                 | 4.0  | -19.8                 |
| HA   | Upstream        | 17-Aug-14   | 20.4                            | 0.3  | 6.4   | 1.1  | 11.1 | 31.9   | 0.73           | 13.6                 | 18.7                 | 4.1  |                       |
| HB   | Upstream        | 9-Jul-14    | 177.0                           | 1.0  | 23.9  | 8.7  | 6.8  | 57.8   | 0.77           | 13.8                 | 18.0                 | 3.8  | -20.0                 |
| HB   | Upstream        | 17-Aug-14   | 112.5                           | 0.8  | 18.4  | 6.1  | 7.6  | 8.0    | 0.76           | 13.3                 | 17.4                 | 4.1  |                       |
| HC   | Upstream        | 9-Jul-14    | 79.5                            | 1.2  | 10.6  | 4.2  | 9.1  | 9.0    | 0.74           | 14.5                 | 19.6                 | 3.4  | -20.1                 |
| HC   | Upstream        | 17-Aug-14   | 55.1                            | 0.7  | 9.1   | 3.1  | 7.8  | 8.6    | 0.73           | 14.1                 | 19.3                 | 3.6  |                       |
| HD   | Upstream        | 9-Jul-14    | 129.7                           | 2.0  | 17.8  | 5.5  | 13.3 | 161.7  | 0.77           | 14.2                 | 18.4                 | 3.7  | -20.6                 |
| HD   | Upstream        | 17-Aug-14   | 98.5                            | 1.2  | 16.8  | 4.2  | 14.0 | 1,213  | 0.76           | 13.3                 | 17.4                 | 3.9  |                       |
| SA   | Upstream        | 6-Jul-14    | 113.5                           | 0.9  | 21.9  | 5.4  | 23.7 |        | 0.77           | 14.1                 | 18.3                 | 3.6  |                       |
| SA   | Upstream        | 21-Jul-14   | 121.5                           | 0.7  | 24.5  | 5.7  | 26.1 | 3.7    | 0.78           | 14.4                 | 18.5                 | 4.1  | -20.4                 |
| SA   | Upstream        | 29-Jul-14   | 73.2                            | 0.5  | 15.6  | 3.3  | 23.9 | 35.1   | 0.74           | 13.3                 | 18.0                 | 4.2  |                       |
| SA   | Upstream        | 11-Aug-14   | 107.1                           | 1.0  | 20.6  | 5.6  | 23.8 | 46.6   | 0.74           | 13.3                 | 18.1                 | 4.1  |                       |
| SB   | Upstream        | 7-Jul-14    | 523.5                           | 4.3  | 85.9  | 24.8 | 10.8 |        | 0.82           | 15.7                 | 19.2                 | 3.2  |                       |
| SB   | Upstream        | 20-Jul-14   | 306.1                           | 18.9 | 29.5  | 14.5 | 11.8 | 905.7  | 0.74           | 14.5                 | 19.6                 | 3.1  | -20.4                 |
| SB   | Upstream        | 10-Aug-14   | 322.0                           | 18.7 | 28.5  | 12.6 | 10.2 | 632.7  | 0.8            | 14.0                 | 17.5                 | 3.7  |                       |
| SB   | Upstream        | 27-Jul-14   | 211.0                           | 7.3  | 18.9  | 7.7  | 10.6 | 1,571  | 0.74           | 14.5                 | 19.4                 | 3.3  |                       |
| SC   | Upstream        | 16-Jul-14   | 54.2                            | 1.5  | 7.9   | 2.7  | 16.0 | 2,940  | 0.76           | 13.4                 | 17.8                 | 3.7  | -20.3                 |

| Site | Sample Location | Sample Date | Sp. Cond.<br>$\mu\text{S cm}^{-1}$ | Na                 | Ca                 | Mg                 | DOC                | TSS                | S <sub>R</sub> | S <sub>275-295</sub> | S <sub>350-400</sub> | SUVA                               | $\delta^{18}\text{O}$ |
|------|-----------------|-------------|------------------------------------|--------------------|--------------------|--------------------|--------------------|--------------------|----------------|----------------------|----------------------|------------------------------------|-----------------------|
| SC   | Upstream        | 31-Jul-14   | 0.99                               | mg L <sup>-1</sup> | 0.72           | x 10 <sup>3</sup>    | x 10 <sup>3</sup>    | L mg <sup>-1</sup> m <sup>-1</sup> |                       |
| SC   | Upstream        | 31-Jul-14   | 70.8                               | 1.0                | 9.3                | 3.7                | 11.6               | 220.9              | 0.72           | 13.5                 | 18.8                 | 3.9                                |                       |
| SD   | Upstream        | 15-Jul-14   | 68.1                               | 0.6                | 10.2               | 3.7                | 6.6                | 34.5               | 0.74           | 13.7                 | 18.6                 | 3.7                                | -19.6                 |
| SD   | Upstream        | 1-Aug-14    | 34.4                               | 0.3                | 7.5                | 1.8                | 8.8                | 9.0                | 0.73           | 14.1                 | 19.4                 | 3.9                                |                       |
| SD   | Upstream        | 22-Aug-14   | 53.9                               | 0.3                | 9.0                | 2.4                | 7.4                | 3.7                | 0.71           | 13.5                 | 18.8                 | 3.7                                |                       |
| HA   | Within          | 9-Jul-14    | 1802                               | 44.9               | 283.7              | 87.4               | 12.0               | 20,645             | 0.88           | 20.7                 | 23.7                 | 1.2                                | -22.2                 |
| HA   | Within          | 17-Aug-14   | 1035                               | 57.6               | 147.2              | 56.4               | 10.5               | 185,667            | 0.99           | 24.0                 | 24.3                 | 1.0                                |                       |
| HB   | Within          | 9-Jul-14    | 691.5                              | 34.9               | 74.3               | 28.8               | 10.1               | 111,491            | 1              | 23.2                 | 23.2                 | 1.1                                | -24.4                 |
| HB   | Within          | 17-Aug-14   | 556.5                              | 30.0               | 61.2               | 25.1               | 9.2                | 165,600            | 1.03           | 22.1                 | 21.5                 | 1.0                                |                       |
| HC   | Within          | 9-Jul-14    | 263.5                              | 6.1                | 30.3               | 11.0               | 6.6                | 42,475             | 0.96           | 16.6                 | 17.3                 | 2.3                                | -20.8                 |
| HC   | Within          | 17-Aug-14   | 561.2                              | 29.6               | 122.0              | 55.6               | 13.0               | 1,039,100          | 0.92           | 20.1                 | 21.9                 | 1.3                                |                       |
| HD   | Within          | 9-Jul-14    | 782.0                              | 45.6               | 73.7               | 27.0               | 18.5               | 63,456             | 0.85           | 17.2                 | 20.2                 | 1.3                                | -22.4                 |
| SA   | Within          | 21-Jul-14   | 2353                               | 134.9              | 422.0              | 137.4              | 25.0               | 2,156              | 0.88           | 19.5                 | 22.2                 | 1.1                                | -21.3                 |
| SA   | Within          | 29-Jul-14   | 1560                               | 42.5               | 240.4              | 76.4               | 17.4               | 44,200             | 0.84           | 19.6                 | 23.3                 | 1.3                                |                       |
| SA   | Within          | 11-Aug-14   | 2029                               | 82.3               | 323.8              | 107.9              | 21.1               | 42,200             | 0.84           | 19.6                 | 23.4                 | 1.3                                |                       |
| SB   | Within          | 7-Jul-14    |                                    |                    |                    |                    |                    |                    | 1.19           | 20.3                 | 17.0                 |                                    |                       |
| SB   | Within          | 19-Jul-14   | 1929                               | 61.4               | 427.9              | 169.1              | 5.8                | 610,400            | 0.97           | 22.8                 | 23.4                 | 0.9                                | -24.3                 |
| SB   | Within          | 27-Jul-14   | 2417                               | 42.9               | 450.2              | 123.5              | 8.9                | 44,567             | 0.89           | 19.8                 | 22.2                 | 1.2                                |                       |
| SB   | Within          | 10-Aug-14   | 2500                               | 54.1               | 510.8              | 171.2              | 6.6                | 143,600            | 0.91           | 20.7                 | 22.7                 | 1.2                                |                       |
| SC   | Within          | 16-Jul-14   | 1507                               | 86.9               | 172.2              | 81.8               | 10.5               | 101,367            | 0.87           | 20.7                 | 23.8                 | 1.4                                | -25.8                 |
| SC   | Within          | 31-Jul-14   | 1388                               | 79.3               | 134.9              | 66.1               | 9.7                | 136,000            | 0.87           | 20.6                 | 23.6                 | 1.4                                |                       |
| SD   | Within          | 15-Jul-14   | 146.8                              | 1.8                | 16.0               | 6.2                | 5.4                | 14,800             | 0.98           | 14.4                 | 14.7                 | 2.7                                | -19.9                 |
| SD   | Within          | 1-Aug-14    | 56.8                               | 2.0                | 8.8                | 2.5                | 7.7                | 1,966              | 0.79           | 14.1                 | 17.9                 | 3.7                                |                       |

**Table S2:** Data for the increased frequency ‘environmental controls’ measurements taken at slump FM3. Meteorological data presented in Figure 6 were obtained from the Government of the Northwest Territories Environment and Natural Resources Division and are not presented here.

| Sample Date (2014) | Downstream DOC flux<br>mg s <sup>-1</sup> | Upstream DOC flux<br>mg s <sup>-1</sup> | Downstream [TSS]<br>mg L <sup>-1</sup> | Upstream [TSS]<br>mg L <sup>-1</sup> | Downstream [DOC]<br>mg L <sup>-1</sup> | Upstream [DOC]<br>mg L <sup>-1</sup> |
|--------------------|-------------------------------------------|-----------------------------------------|----------------------------------------|--------------------------------------|----------------------------------------|--------------------------------------|
| 12-Jul             | 288.3                                     | 227.9                                   | 61,633                                 | 236.0                                | 10.0                                   | 14.3                                 |
| 14-Jul             | 158.5                                     | 148.4                                   | 50,940                                 | 228.6                                | 11.3                                   | 16.0                                 |
| 16-Jul             | 1111                                      | 1133                                    | 27,050                                 | 2940                                 | 12.6                                   | 16.0                                 |
| 17-Jul             | 1170                                      | 844.2                                   | 14,633                                 | 384.5                                | 12.0                                   | 15.1                                 |
| 18-Jul             | 530.6                                     | 403.6                                   | 16,800                                 | 205.1                                | 12.6                                   | 15.2                                 |
| 20-Jul             | 383.0                                     | 333.1                                   | 18,267                                 | 219.3                                | 12.7                                   | 16.4                                 |
| 22-Jul             | 130.9                                     | 165.9                                   | 9,750                                  | 81.2                                 | 13.7                                   | 16.8                                 |
| 23-Jul             | 255.5                                     | 175.8                                   | 9,875                                  | 79.6                                 | 14.2                                   | 17.9                                 |
| 28-Jul             | 1213                                      | 989.3                                   | 6,375                                  | 280.9                                | 10.4                                   | 12.0                                 |
| 30-Jul             | 689.4                                     | 634.2                                   | 6,675                                  | 172.6                                | 10.3                                   | 11.8                                 |
| 31-Jul             | 549.5                                     | 575.5                                   | 14,000                                 | 220.9                                | 9.4                                    | 11.6                                 |
| 2-Aug              | 903.4                                     | 915.2                                   | 10,588                                 | 347.2                                | 9.6                                    | 11.4                                 |
| 3-Aug              | 3574                                      | 3207                                    | 5,100                                  | 481.3                                | 10.9                                   | 12.9                                 |
| 4-Aug              | 1944                                      | 1402                                    | 4,083                                  | 321.1                                | 10.9                                   | 12.3                                 |
| 7-Aug              | 707.5                                     | 1116                                    | 6,038                                  | 228.1                                | 9.9                                    | 12.1                                 |
| 8-Aug              | 457.1                                     | 744.8                                   | 7,238                                  | 165.3                                | 10.0                                   | 11.5                                 |
| 10-Aug             | 282                                       | 304.3                                   | 10,129                                 | 299.0                                | 9.5                                    | 11.4                                 |
| 11-Aug             | 341                                       | 229.1                                   | 15,950                                 | 204.4                                | 10.1                                   | 11.8                                 |
| 12-Aug             | 315                                       | 207.1                                   | 9,300                                  | 141.2                                | 10.2                                   | 11.9                                 |
