# Supplementary material for: Retrogressive thaw slumps temper dissolved organic carbon delivery to streams of the Peel Plateau, NWT, Canada
Source: Copernicus journal article supplement (doi:10.5194/bg-14-5487-2017), 2017-12-06
Supplement: Supplementary file [file bg-14-5487-2017-supplement-title-page.pdf › bg-14-5487-2017-supplement-title-page.pdf]

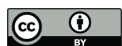

## *Supplement of*

# **Retrogressive thaw slumps temper dissolved organic carbon delivery to streams of the Peel Plateau, NWT, Canada**

**Cara A. Littlefair et al.**

*Correspondence to:* Cara A. Littlefair (cara.bulger@gmail.com)

- bg-14-5487-2017-supplement-title-page.pdf
- Bulger\_DOC manuscript\_Supplement
  - Bulger\_DOC manuscript\_Fig S1.pdf
  - Bulger\_DOC manuscript\_Tables S1 and S2.pdf

The copyright of individual parts of the supplement might differ from the CC BY 3.0 License.
